# Supplementary material
Source: MDPI journal article supplement (https://www.mdpi.com/2624-8549/5/2/52)
Supplement: s1 [file s1]

## Supplementary Material

### Synthesis and structure of COE-11, a new borosilicate zeolite with a 2-dimensional pore system of 12 ring channels

Bernd Marler<sup>1</sup>, Hermann Gies<sup>1</sup>, Trees De Baerdemaeker<sup>2</sup>, Ulrich Müller<sup>2</sup>, Andrei-Nicolae Parvulescu<sup>2</sup>, Weiping Zhang<sup>3</sup>, Toshiyuki Yokoi<sup>4</sup>, Feng-Shou Xiao<sup>5</sup>, Xiangju Meng<sup>6</sup>, Dirk De Vos<sup>7</sup>, Ute Kolb<sup>8,\*</sup>

*1 Institute of Geology, Mineralogy and Geophysics, Ruhr-University Bochum, 44780 Bochum, Germany*

*2 Process Research and Chemical Engineering, BASF SE, 67056 Ludwigshafen, Germany*

*3 State Key Laboratory of Fine Chemicals, Dalian University of Technology, 116024 Dalian, China*

*4 Chemical Resources Laboratory, Tokyo Institute of Technology, 226-8503 Yokohama, Japan*

*5 College of Chemical and Biological Engineering, Zhejiang University, 310028 Hangzhou, China*

*6 Department of Chemistry, Zhejiang University, 310028 Hangzhou, China*

*7 Centre for Membrane separations, Adsorption, Catalysis and Spectroscopy for Sustainable Solutions (cMACS), KU Leuven, 3001 Leuven, Belgium*

*8 Institute for Inorganic Chemistry and Analytical Chemistry, Johannes Gutenberg-University, 55128 Mainz, Germany*

## Table of Contents

|                                                                                                                                                                                                                                                                                                                                                                                                                                       |    |
|---------------------------------------------------------------------------------------------------------------------------------------------------------------------------------------------------------------------------------------------------------------------------------------------------------------------------------------------------------------------------------------------------------------------------------------|----|
| Figure S1: XRD powder patterns of products from 200 ml scale syntheses with gel composition 1 SiO <sub>2</sub> / 0.1 H <sub>3</sub> BO <sub>3</sub> / 0.25 NaOH / 0.33 OSDA / 16 H <sub>2</sub> O using Ludox HS-30 as Si-source and crystallized for (a) 4 days at 155°C, (b) 4 days at 155°C followed by 3 days at 165°C, (c) 4 days at 155°C followed by 4 days at 165°C and (d) 4 days at 155°C followed by 5 days at 165°C. .... | 2  |
| Figure S2: Comparison of XRD powder patterns of COE-11 (sample S21, top) and classical disordered Beta (bottom). ....                                                                                                                                                                                                                                                                                                                 | 3  |
| Figure S3: Left: Difference Fourier map based on PXRD data considering only the framework atoms. The remaining positive electron density in the channel-like voids (yellow) represents the TEA cations; right: Section of a Fourier map based on 3D ED data showing a similar potential in the zeolite pores being related to the TEA cation. ....                                                                                    | 4  |
| Figure S4: Plot of diffraction patterns after Rietveld analysis: Experimental data (red), calculated data (black), the difference plot (blue) and allowed reflections (green tick marks) are presented. ....                                                                                                                                                                                                                          | 5  |
| Figure S5: Comparison of PXRD patterns of as-made COE-11 (bottom), calcined and dehydrated COE-11 (middle) and disordered cristobalite obtained by heating COE-11 up to 1000°C (top). ....                                                                                                                                                                                                                                            | 6  |
| Table S1: Recording conditions of the NMR spectra. ....                                                                                                                                                                                                                                                                                                                                                                               | 7  |
| Table S2: Crystallographic information about 3DED/FAST-ADT measurements, structure solution and refinement of COE-11. ....                                                                                                                                                                                                                                                                                                            | 8  |
| Table S3: Atomic coordinates, isotropic atomic displacement parameters and occupancies of as-made COE-11 (3D ED data). ....                                                                                                                                                                                                                                                                                                           | 9  |
| Table S4: Experimental and crystallographic parameters for the Rietveld analysis of COE-11. ....                                                                                                                                                                                                                                                                                                                                      | 12 |

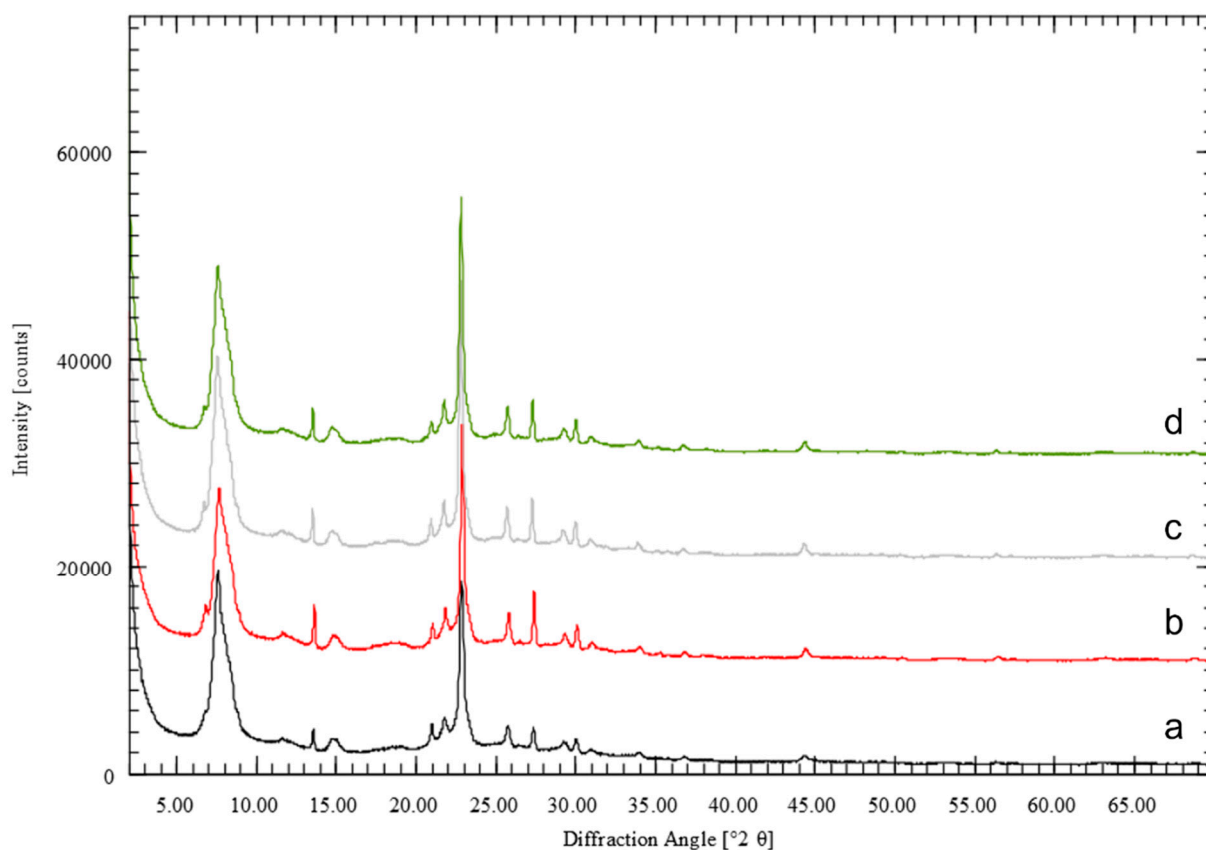

Figure S1: XRD powder patterns of products from 200 ml scale syntheses with gel composition 1  $\text{SiO}_2$  / 0.1  $\text{H}_3\text{BO}_3$  / 0.25  $\text{NaOH}$  / 0.33 OSDA / 16  $\text{H}_2\text{O}$  using Ludox HS-30 as Si-source and crystallized for (a) 4 days at 155°C, (b) 4 days at 155°C followed by 3 days at 165°C, (c) 4 days at 155°C followed by 4 days at 165°C and (d) 4 days at 155°C followed by 5 days at 165°C.

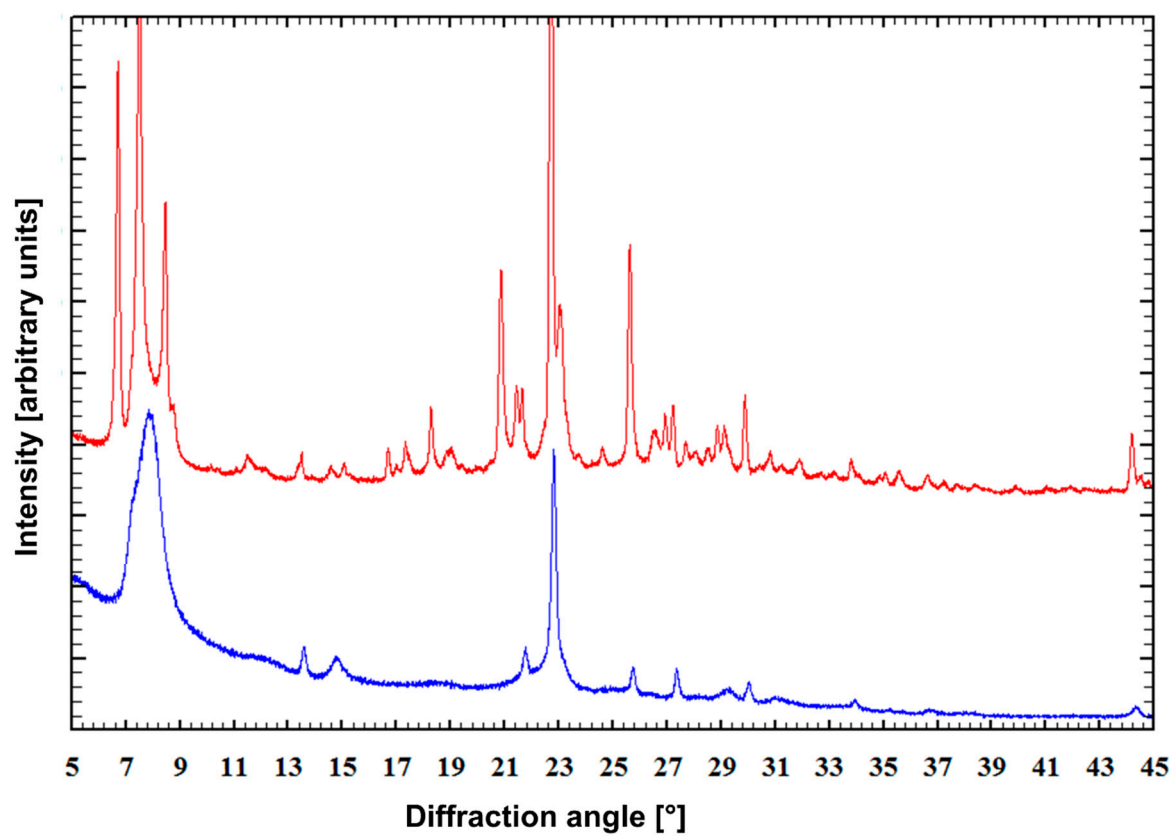

Figure S2: Comparison of XRD powder patterns of COE-11 (sample S21, top) and classical disordered Beta (bottom).

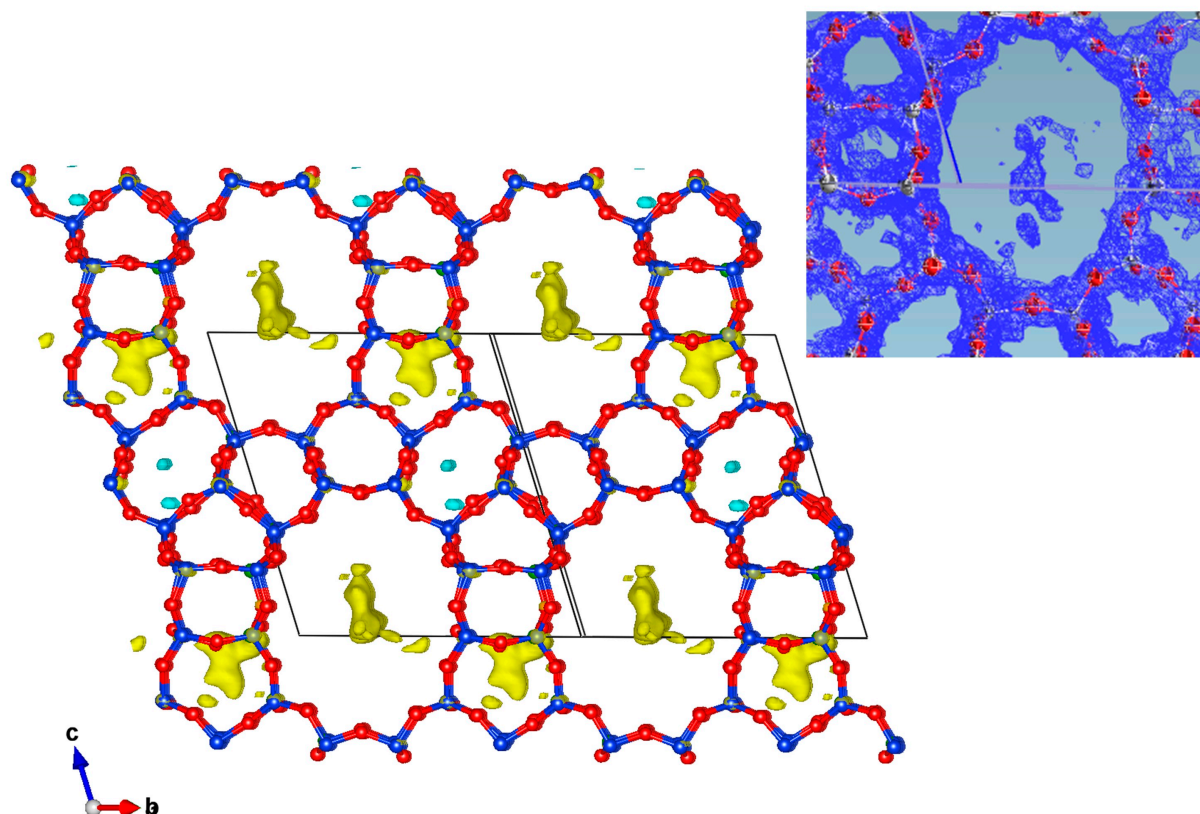

Figure S3: Left: Difference Fourier map based on PXRD data considering only the framework atoms. The remaining positive electron density in the channel-like voids (yellow) represents the TEA cations; right: Section of a Fourier map based on 3D ED data showing a similar potential in the zeolite pores being related to the TEA cation.

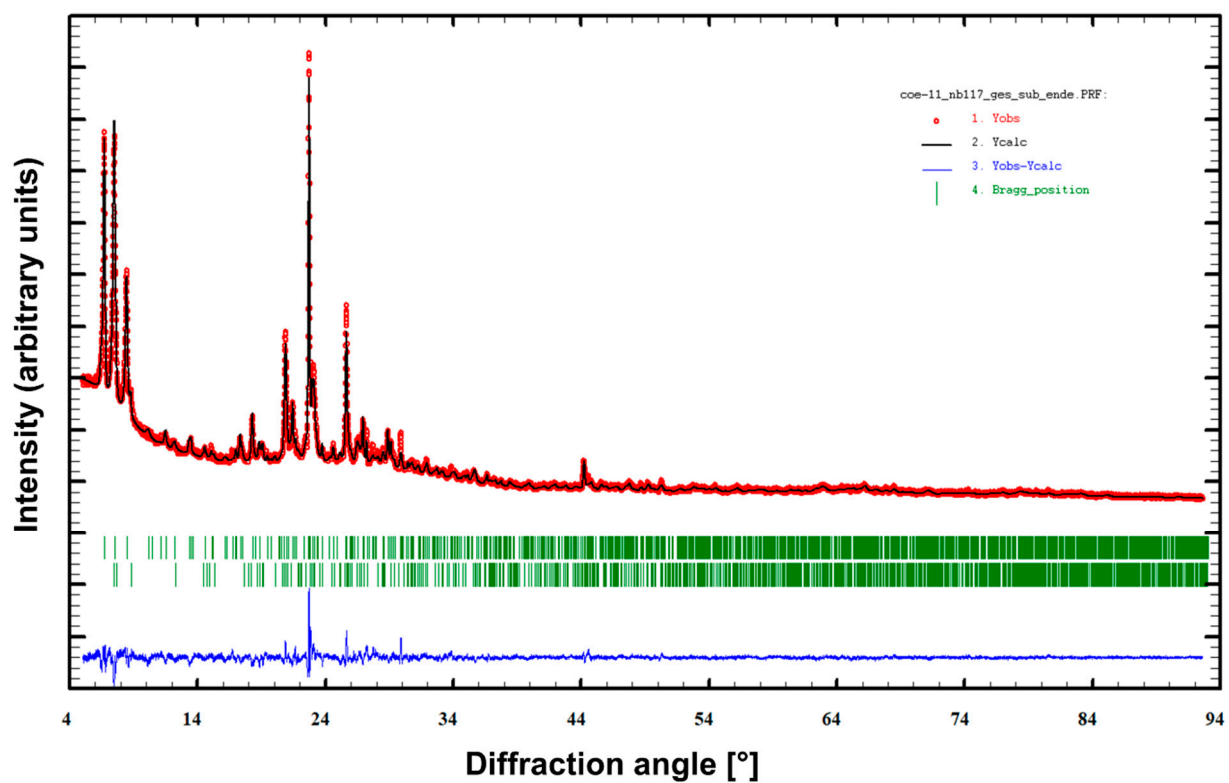

Figure S4: Plot of diffraction patterns after Rietveld analysis: Experimental data (red), calculated data (black) and the difference plot (blue) are presented. Green tick marks indicate allowed reflections.

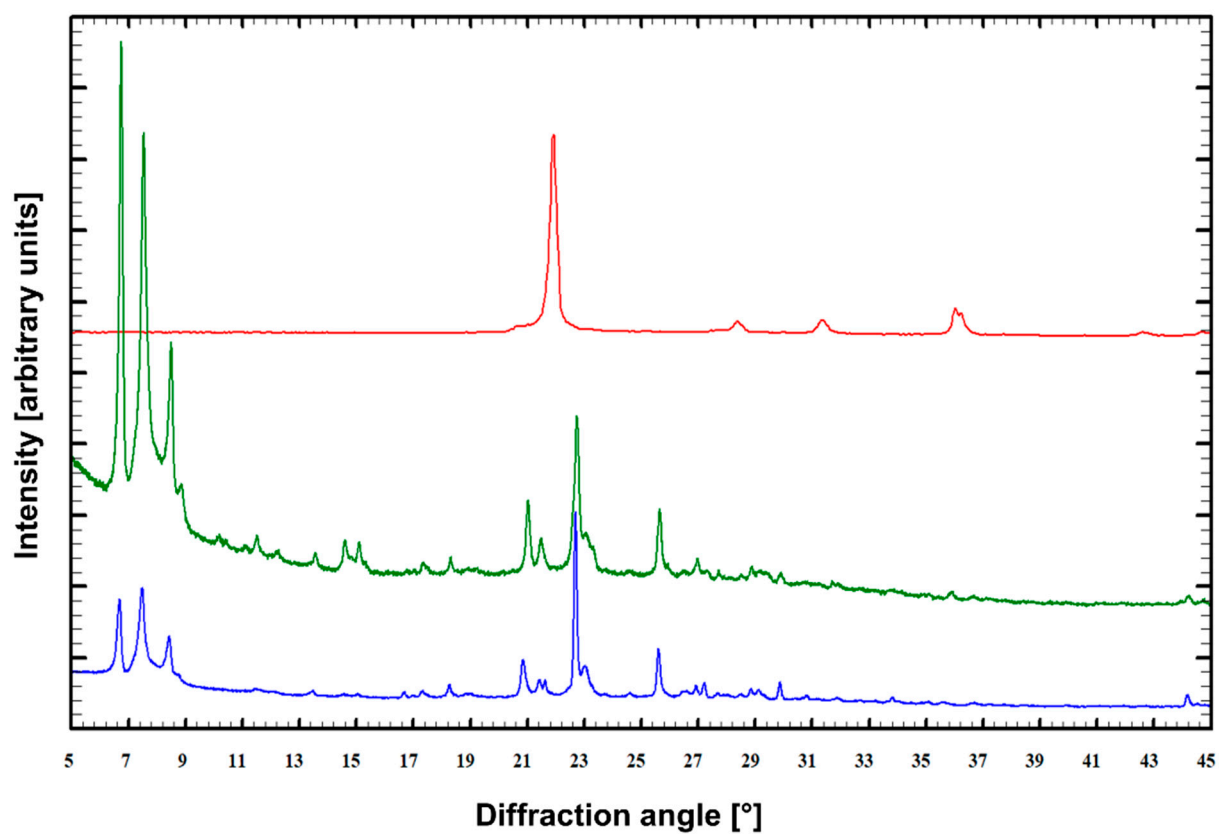

Figure S5: Comparison of PXRD patterns of as-made COE-11 (bottom), calcined and dehydrated COE-11 (middle) and disordered cristobalite obtained by heating COE-11 up to 1000°C (top)

Table S1: Recording conditions of the NMR spectra.

|                                         | <sup>13</sup> C CP<br>MAS | <sup>11</sup> B CP<br>MAS | <sup>29</sup> Si CP<br>MAS | <sup>1</sup> H<br>MAS |
|-----------------------------------------|---------------------------|---------------------------|----------------------------|-----------------------|
| <b>Standard</b>                         | TMS                       | NaBH <sub>4</sub>         | TMS                        | TMS                   |
| <b>Frequency (MHz)</b>                  | 100.62                    | 128.39                    | 79.50                      | 400.18                |
| <b>Pulse length (10<sup>-6</sup> s)</b> | 10                        | 4                         | 10                         | 6                     |
| <b>Contact time (10<sup>-3</sup> s)</b> | 1.5                       | –                         | 1                          | –                     |
| <b>Recycle time (s)</b>                 | 5                         | 1                         | <b>5</b>                   | 10                    |
| <b>Spinning rate (kHz)</b>              | 4.0                       | 12.5                      | 4.0                        | 12.5                  |
| <b>No. of scans</b>                     | 400                       | 6400                      | 800                        | 128                   |

Table S2: Crystallographic information about 3DED/FAST-ADT measurements, structure solution and refinement of COE-11.

| <b>Data acquisition</b>                                                             |                               |                                           |                                        |
|-------------------------------------------------------------------------------------|-------------------------------|-------------------------------------------|----------------------------------------|
| Tilt range (°)                                                                      | -60/+70                       | Temperature                               | Liq. N <sub>2</sub>                    |
| Radiation                                                                           | Electrons                     | Wavelength $\lambda$ (Å)                  | 0.0197 (300 keV)                       |
| Camera settings (CCD 4Kx4K)                                                         | Exposure 2, Bin 4             | Diffraction mode                          | NED                                    |
| Imaging mode                                                                        | $\mu$ -STEM                   | Beam size                                 | 400 nm                                 |
| <b>Crystal data (3DED)/XRPD cell parameters used for crystal structure solution</b> |                               |                                           |                                        |
| Space group                                                                         | <i>C</i> 2 #5 ( <i>Z</i> =2)  | <i>V</i> (Å <sup>3</sup> ) / calc density | 3931.7(5) / 1.866 (g/cm <sup>3</sup> ) |
| <i>a</i> (Å)                                                                        | 17.18 / 17.3494 (11)          | $\alpha$ (°)                              | 90.0                                   |
| <i>b</i> (Å)                                                                        | 17.23 / 17.3409 (11)          | $\beta$ (°)                               | 113.69 (5) / 113.762 (2)               |
| <i>c</i> (Å)                                                                        | 14.29 / 14.2789 (4)           | $\gamma$ (°)                              | 90.0                                   |
| No. of indep. Si and O atoms                                                        | 19 + 33                       | Chemical content (unit cell)              | C16 H40 N2 O132 Si66                   |
| <b>Structure solution (SIR2019)</b>                                                 |                               |                                           |                                        |
| No. of sampled reflections                                                          | 8746                          | No. of independent reflections            | 2148                                   |
| Resolution (Å)                                                                      | 1.0                           | Completeness (%)                          | 99                                     |
| <i>R</i> <sub>sym</sub>                                                             | 0.1181                        | Overall <i>U</i> (Å <sup>2</sup> )        | 0.00927                                |
| Residual <i>R</i> ( <i>F</i> ) ( <i>SIR</i> 2019)                                   | 0.1958                        | Reflections/parameter ratio               | 6.37                                   |
| <b>Structure refinement (SHELXL)</b>                                                |                               |                                           |                                        |
| No. of reflections > 4 $\sigma$ ( <i>I</i> )                                        | 5423                          | No. of independent reflections            | 5891                                   |
| - <i>h</i> – <i>h</i>                                                               | -19 – 19                      | Parameters (framework only)               | 199 / 1                                |
| - <i>k</i> – <i>k</i>                                                               | -19 – 19                      | Parameters/restraints (framework + TEA)   | 213 / 209                              |
| - <i>l</i> – <i>l</i>                                                               | -16 – 16                      | Reflections/parameter ratio               | 29.6 resp. 27.7                        |
| Resolution (Å)                                                                      | 0.8                           | Hydrogen treatment TEA                    | Riding                                 |
| <b>Refinement results</b>                                                           |                               |                                           |                                        |
|                                                                                     | Framework only (unrestrained) |                                           | Framework + TEA (restrained)           |
| <i>R</i> (all)                                                                      | 0.2397                        | <i>R</i> (all)                            | 0.2281                                 |
| <i>R</i> > 4 $\sigma$ ( <i>I</i> )                                                  | 0.2304                        | <i>R</i> > 4 $\sigma$ ( <i>I</i> )        | 0.2181                                 |
| w <i>R</i> > 4 $\sigma$ ( <i>I</i> )                                                | 0.5295                        | w <i>R</i> > 4 $\sigma$ ( <i>I</i> )      | 0.5308                                 |
| Goodness of fit                                                                     | 3.994                         | Goodness of fit                           | 4.011                                  |
| Last shift mean (Å)                                                                 | 0.042                         | Last shift mean (Å)                       | 0.036                                  |



Table S3: Atomic coordinates, isotropic atomic displacement parameters and occupancies of as-made COE-11 (3D ED data).

| Atom | x frac    | y frac     | z frac     | Uiso     | Occupancy |
|------|-----------|------------|------------|----------|-----------|
| Si1  | 0.00000   | 0.8978(6)  | 0.500000   | 0.022(4) | 1         |
| Si2  | 0.8121(7) | 0.7031(5)  | 0.5117(8)  | 0.024(3) | 1         |
| Si3  | 0.00000   | 0.5125(5)  | 0.500000   | 0.007(3) | 1         |
| Si4  | 0.6804(7) | 0.5763(6)  | 0.4976(9)  | 0.032(3) | 1         |
| Si5  | 0.9820(6) | 0.6253(5)  | 0.6537(7)  | 0.015(2) | 1         |
| Si6  | 0.6298(6) | 0.8873(4)  | 0.5065(7)  | 0.012(2) | 1         |
| Si7  | 0.7895(6) | 0.8215(5)  | 0.6666(8)  | 0.019(2) | 1         |
| Si8  | 0.8958(7) | 0.5628(5)  | 0.7905(8)  | 0.025(3) | 1         |
| Si9  | 0.500000  | 0.7613(7)  | 0.500000   | 0.031(4) | 1         |
| Si10 | 0.7908(6) | 0.4431(4)  | 0.6353(7)  | 0.013(2) | 1         |
| Si11 | 0.8348(6) | 0.8149(5)  | 0.3630(8)  | 0.017(2) | 1         |
| Si12 | 0.7709(7) | 0.6910(5)  | 0.7938(8)  | 0.022(3) | 1         |
| Si13 | 0.5979(6) | 0.6376(5)  | 0.6445(8)  | 0.023(3) | 1         |
| Si14 | 1.0914(6) | 0.7595(5)  | 0.7799(8)  | 0.022(3) | 1         |
| Si15 | 0.9659(7) | 0.8897(5)  | 0.7869(8)  | 0.032(3) | 1         |
| Si16 | 0.9761(7) | 1.0116(6)  | 0.6561(9)  | 0.036(3) | 1         |
| Si17 | 0.8803(7) | 0.7169(5)  | 1.0076(8)  | 0.029(3) | 1         |
| Si18 | 0.00000   | 0.5980(8)  | 0.00000    | 0.046(5) | 1         |
| Si19 | 0.00000   | 0.8408(6)  | 0.00000    | 0.019(3) | 1         |
| O1   | 0.6139(8) | 0.5526(8)  | 0.3857(10) | 0.034(4) | 1         |
| O2   | 1.0209(9) | 0.5653(7)  | 0.5993(8)  | 0.034(4) | 1         |
| O3   | 0.8028(9) | 0.7413(6)  | 0.4049(9)  | 0.016(3) | 1         |
| O4   | 0.4610(9) | 0.7100(7)  | 0.3999(8)  | 0.035(4) | 1         |
| O5   | 0.7117(9) | 0.8787(10) | 0.6092(12) | 0.056(6) | 1         |
| O6   | 0.9416(7) | 0.5450(6)  | 0.9085(7)  | 0.017(3) | 1         |
| O7   | 0.8690(7) | 0.8775(9)  | 0.7170(13) | 0.044(5) | 1         |

|     |            |            |            |          |         |
|-----|------------|------------|------------|----------|---------|
| O8  | 1.1425(10) | 0.7357(9)  | 0.8968(9)  | 0.037(4) | 1       |
| O9  | 0.7950(9)  | 0.6949(9)  | 0.9145(8)  | 0.044(5) | 1       |
| O10 | 0.9834(10) | 0.8964(7)  | 0.9043(7)  | 0.037(4) | 1       |
| O11 | 0.6507(9)  | 0.8971(7)  | 0.4075(11) | 0.025(4) | 1       |
| O12 | 0.8328(9)  | 0.6342(7)  | 0.7704(13) | 0.031(4) | 1       |
| O13 | 0.8443(10) | 0.4864(7)  | 0.7404(10) | 0.035(4) | 1       |
| O14 | 0.9790(11) | 0.9494(7)  | 0.5780(10) | 0.032(4) | 1       |
| O15 | 0.8400(10) | 0.7955(10) | 0.2563(11) | 0.048(5) | 1       |
| O16 | 0.5808(7)  | 0.9613(6)  | 0.5178(13) | 0.037(5) | 1       |
| O17 | 0.9178(6)  | 0.7911(7)  | 0.9770(13) | 0.038(5) | 1       |
| O18 | 1.0205(11) | 0.8220(8)  | 0.7685(16) | 0.052(6) | 1       |
| O19 | 0.5712(8)  | 0.8141(7)  | 0.4883(14) | 0.040(5) | 1       |
| O20 | 0.8013(13) | 0.7691(9)  | 0.5827(13) | 0.050(6) | 1       |
| O21 | 0.7750(13) | 0.7756(7)  | 0.7532(13) | 0.047(5) | 1       |
| O22 | 0.9575(10) | 0.5795(8)  | 0.7351(12) | 0.032(4) | 1       |
| O23 | 0.9452(8)  | 0.6495(7)  | 1.0416(11) | 0.032(4) | 1       |
| O24 | 0.9007(8)  | 0.6620(10) | 0.5664(13) | 0.054(6) | 1       |
| O25 | 0.5472(9)  | 0.5735(7)  | 0.6748(13) | 0.031(4) | 1       |
| O26 | 0.7374(9)  | 0.6418(8)  | 0.4805(13) | 0.036(4) | 1       |
| O27 | 1.0521(9)  | 0.6859(7)  | 0.7126(11) | 0.027(4) | 1       |
| O28 | 0.6306(13) | 0.6066(11) | 0.5623(14) | 0.061(6) | 1       |
| O29 | 0.6758(8)  | 0.6620(10) | 0.7461(12) | 0.051(6) | 1       |
| O30 | 0.9227(7)  | 0.8416(8)  | 0.4424(12) | 0.055(6) | 1       |
| O31 | 0.9933(10) | 0.9729(6)  | 0.7631(9)  | 0.023(4) | 1       |
| O32 | 0.7379(11) | 0.5050(8)  | 0.5524(13) | 0.054(6) | 1       |
| O33 | 0.7702(10) | 0.8844(8)  | 0.3431(15) | 0.052(5) | 1       |
| N1  | 0.264(7)   | 0.476(6)   | 0.005(10)  | 0.32(6)  | 0.50(4) |
| C2  | 0.370(10)  | 0.561(9)   | -0.006(15) | 0.32(6)  | 0.50(4) |
| H2A | 0.361930   | 0.521907   | -0.057324  | 0.480    | 0.50(4) |

|     |           |           |            |         |         |
|-----|-----------|-----------|------------|---------|---------|
| H2B | 0.423073  | 0.553680  | 0.049694   | 0.480   | 0.50(4) |
| H2C | 0.367608  | 0.610860  | -0.036003  | 0.480   | 0.50(4) |
| C3  | 0.243(13) | 0.515(10) | -0.188(11) | 0.32(6) | 0.50(4) |
| H3A | 0.200641  | 0.554242  | -0.203485  | 0.480   | 0.50(4) |
| H3B | 0.234820  | 0.486040  | -0.247979  | 0.480   | 0.50(4) |
| H3C | 0.297839  | 0.539513  | -0.163036  | 0.480   | 0.50(4) |
| C4  | 0.239(9)  | 0.462(7)  | -0.106(11) | 0.32(6) | 0.50(4) |
| H4A | 0.180163  | 0.447206  | -0.130928  | 0.384   | 0.50(4) |
| H4B | 0.269322  | 0.416458  | -0.109882  | 0.384   | 0.50(4) |
| C5  | 0.336(8)  | 0.440(7)  | 0.092(12)  | 0.32(6) | 0.50(4) |
| H5A | 0.388630  | 0.459246  | 0.093116   | 0.384   | 0.50(4) |
| H5B | 0.334513  | 0.384712  | 0.083221   | 0.384   | 0.50(4) |
| C6  | 0.192(8)  | 0.452(8)  | 0.029(13)  | 0.32(6) | 0.50(4) |
| H6A | 0.166040  | 0.498773  | 0.040832   | 0.384   | 0.50(4) |
| H6B | 0.213505  | 0.423418  | 0.092137   | 0.384   | 0.50(4) |
| C8  | 0.123(9)  | 0.405(10) | -0.049(16) | 0.32(6) | 0.50(4) |
| H8A | 0.146564  | 0.375091  | -0.087732  | 0.480   | 0.50(4) |
| H8B | 0.080479  | 0.438701  | -0.093901  | 0.480   | 0.50(4) |
| H8C | 0.099390  | 0.371352  | -0.014488  | 0.480   | 0.50(4) |
| C1  | 0.300(9)  | 0.554(6)  | 0.031(12)  | 0.32(6) | 0.50(4) |
| H1A | 0.322808  | 0.562023  | 0.104858   | 0.384   | 0.50(4) |
| H1B | 0.257350  | 0.592915  | -0.001122  | 0.384   | 0.50(4) |
| C9  | 0.330(12) | 0.459(10) | 0.192(11)  | 0.32(6) | 0.50(4) |
| H9A | 0.362469  | 0.504759  | 0.221068   | 0.480   | 0.50(4) |
| H9B | 0.351962  | 0.416913  | 0.239066   | 0.480   | 0.50(4) |
| H9C | 0.272349  | 0.467982  | 0.180879   | 0.480   | 0.50(4) |

Table S4: Experimental and crystallographic parameters for the Rietveld analysis of COE-11.

|                                          |                                                                                                                    |
|------------------------------------------|--------------------------------------------------------------------------------------------------------------------|
| Sample                                   | S21: COE-11 (+ Beta + MTW)                                                                                         |
| Diffractometer                           | Siemens D5000 with 6° PSD                                                                                          |
| Wavelength                               | 1.54059 Å                                                                                                          |
| Sample                                   | 0.3 mm glass capillary                                                                                             |
| 2 $\Theta$ range of data used [°]        | 3.07 - 92.56                                                                                                       |
| Step size [°2 $\Theta$ ]                 | 0.007863                                                                                                           |
| No. contributing reflections             | 2195                                                                                                               |
| No. geometric restraints                 | 219                                                                                                                |
| No. structural parameters                | 176                                                                                                                |
| No. profile parameters                   | 18                                                                                                                 |
| FWHM at ca. 20°2 $\Theta$ [°2 $\Theta$ ] | 0.10 - 0.24                                                                                                        |
| R <sub>F</sub>                           | 0.039                                                                                                              |
| R <sub>wp</sub>                          | 0.17                                                                                                               |
| R <sub>exp</sub>                         | 0.09                                                                                                               |
| $\chi^2$                                 | 3.53                                                                                                               |
| Space group                              | C2 (No. 5)                                                                                                         |
| a <sub>0</sub> [Å]                       | 17.3494(11)                                                                                                        |
| a <sub>0</sub> [Å]                       | 17.3409(11)                                                                                                        |
| c <sub>0</sub> [Å]                       | 14.2789(4)                                                                                                         |
| V <sub>UC</sub> [Å <sup>3</sup> ]        | 113.762(2)                                                                                                         |
| Unit cell content                        | [(C <sub>2</sub> H <sub>5</sub> ) <sub>4</sub> N] <sub>4</sub> [B <sub>4</sub> Si <sub>62</sub> O <sub>132</sub> ] |
